# Supplementary material for: High-fat diet promotes colitis-associated tumorigenesis by altering gut microbial butyrate metabolism
Source: PubMed Central journal article supplement (PMC10539701; doi:10.7150/ijbs.86717), 2023-09-25
Supplement: ijbsv19p5004s1.pdf [file ijbsv19p5004s1.pdf]

## Supplementary Materials

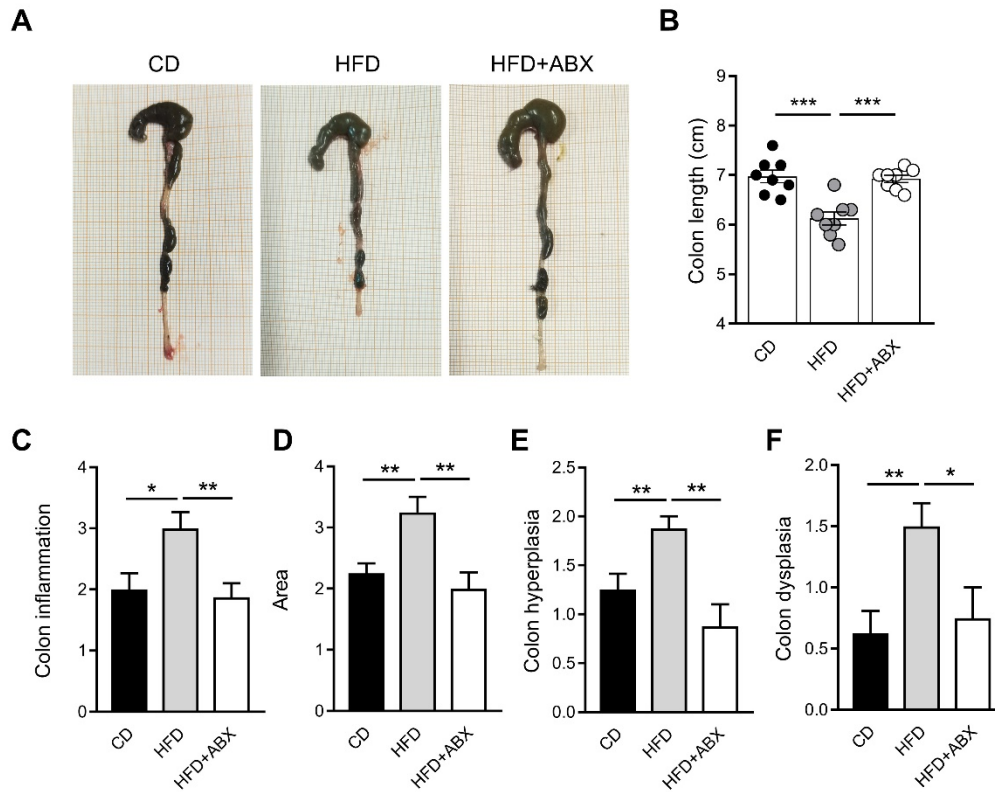

**Supplementary Figure S1.** Effects of HFD on intestinal inflammation in mice. (A) Differences in the whole colon in CD-fed, HFD-fed, and ABX-treated HFD-fed mice. (B) Total colon length in the mice in each group. (C-F) Histopathological analysis of colon inflammation (C), area associated with disease (D), hyperplasia (E), and dysplasia (F) in CD-fed, HFD-fed, and ABX-treated HFD-fed mice. CD-fed,  $n = 8$ ; HFD-fed,  $n = 8$ ; and ABX-treated HFD-fed,  $n = 8$ . \*,  $P < 0.05$ ; \*\*,  $P < 0.01$ ; \*\*\*,  $P < 0.001$ .

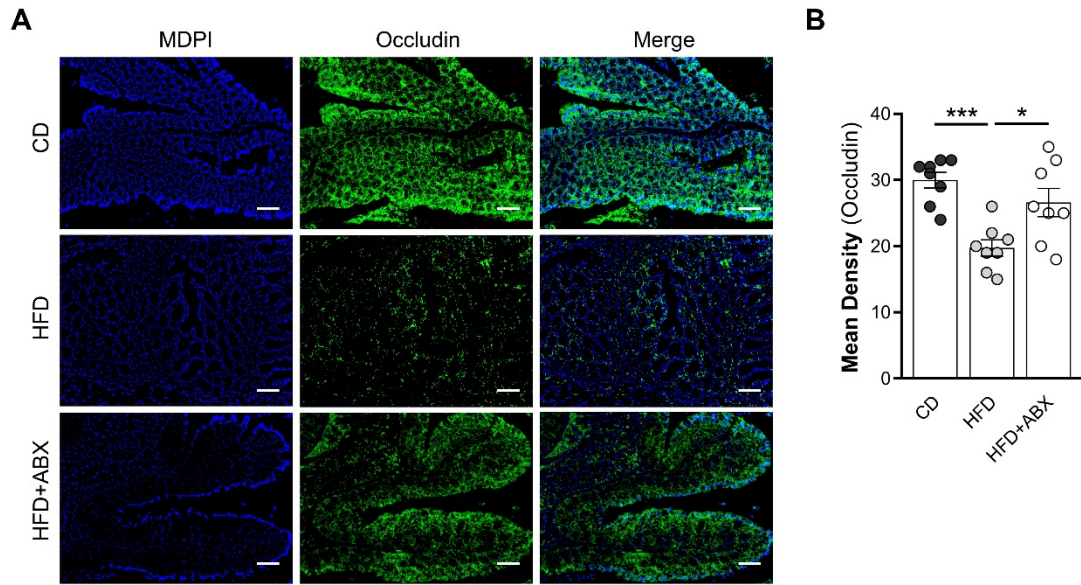

**Supplementary Figure S2.** High-fat diet affects intestinal mucosal tightness. (A) Immunofluorescence staining of mice colons for Occludin. (B) Quantitative analysis of Occludin index. CD-fed,  $n = 8$ ; HFD-fed,  $n = 8$ ; and ABX-treated HFD-fed,  $n = 8$ . \*,  $P < 0.05$ ; \*\*\*,  $P < 0.001$ .

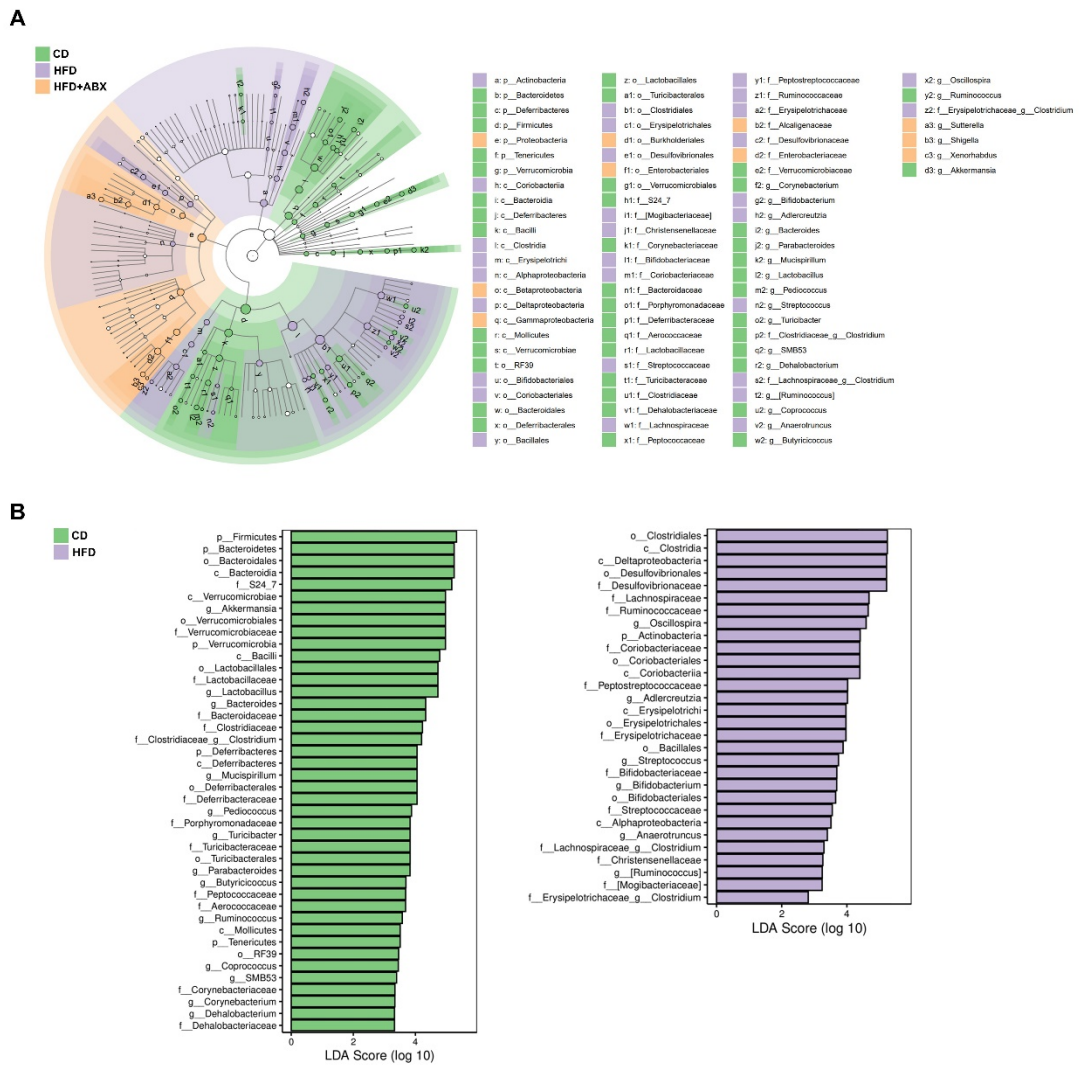

**Supplementary Figure S3.** Effects of HFD on intestinal flora distribution. (A-B) LEfSe analysis of gut microbiota alterations caused by HFD (n=5 in each group).

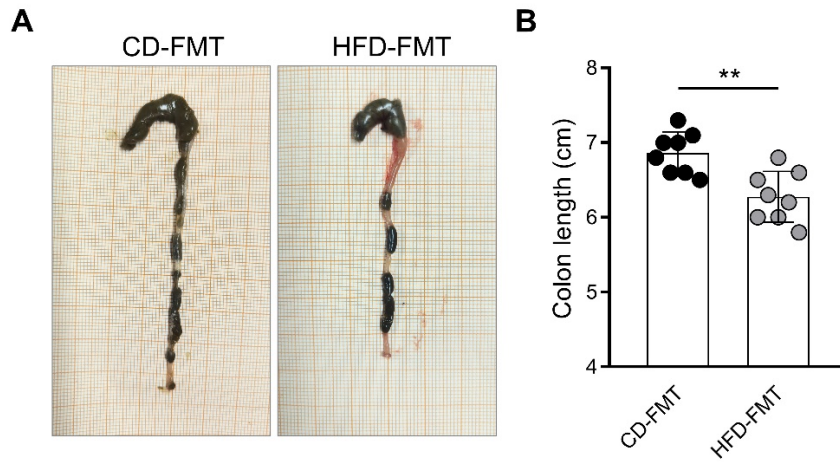

**Supplementary Figure S4.** Fecal transplantation with microbiota from HFD-fed mice enhances intestinal inflammation. (A) Differences in the whole colon in CD-FMT and HFD-FMT. (B) Total colon length in the mice in each group. CD-FMT, n = 8; HFD-FMT, n = 8. \*\*,  $P < 0.01$ .

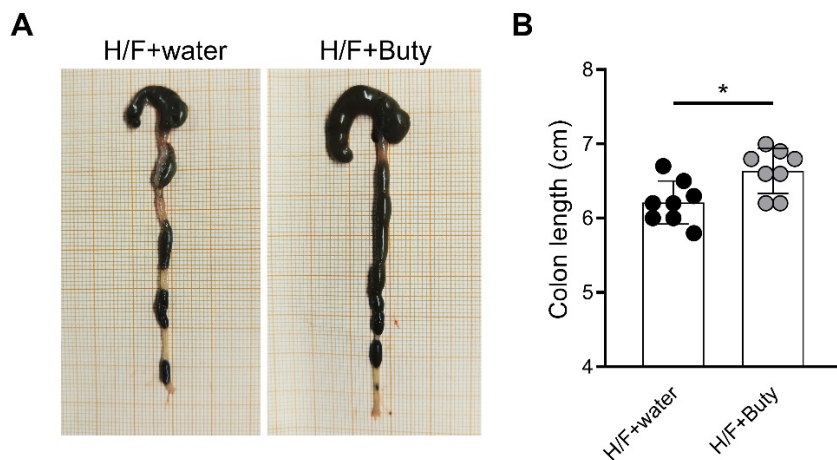

**Supplementary Figure S5.** Butyrate alleviates inflammation levels increased by fecal transplantation with microbiota from HFD-fed mice. (A) Differences in the whole colon in H/F+water and H/F+butyrate. (B) Total colon length in the mice in each group. H/F, HFD-FMT. Buty, butyrate. H/F+water, n = 8; H/F+butyrate, n = 8. \*,  $P < 0.05$ .
